# Supplementary material for: Improvements in Bacterial Primers to Enhance Selective SSU rRNA Gene Amplification of Plant-associated Bacteria by Applying the LNA Oligonucleotide-PCR Clamping Technique
Source: PubMed Central journal article supplement (PMC6167120; doi:10.1264/jsme2.me18071), 2018-09-29
Supplement: 33_340_s1.pdf [file 33_340_s1.pdf]

**Supplementary Table S1** Sequences and coverages of common bacterial primers

| Primer | Position of digenerate base | 5'-Sequence-3'        | Coverage | Position in <i>E.coli</i> | References                                   |
|--------|-----------------------------|-----------------------|----------|---------------------------|----------------------------------------------|
| 68f    | 2N4N17R18R                  | TNANACATGCAAGTCGRRCG  | 74.2%    | 49-68                     | Thijs et al. 2017. Front. Microbiol. 28:494. |
| 341f   | 9N13W                       | CCTACGGGNGGCWGCAG     | 89.1%    | 341-357                   | Thijs et al. 2017. Front. Microbiol. 28:494. |
| 517f   |                             | GCCAGCAGCCGCGGTAA     | 89.9%    | 517-533                   | Wang and Qian 2009. PLoS One 29:e7401.       |
| 799f   | 4M18K                       | AACMGGATTAGATACCCKG   | 81.9%    | 781-799                   | Ghyselinck et al. 2013. PLoS One 8:e71360.   |
| 518r   |                             | ATTACCGCGGCTGCTGG     | 83.8%    | 534-518                   | Ghyselinck et al. 2013. PLoS One 8:e71360.   |
| 805r   | 7H8V                        | GACTACHVGGGTATCTAATCC | 91.1%    | 805-785                   | Thijs et al. 2017. Front. Microbiol. 28:494. |
| 907r   | 11M                         | CCGTCAATTCMTTGGAGTTT  | 84.4%    | 926-907                   | Mao et al. 2012. BMC Microbiol. 12:66.       |
| 1390r  | 14R                         | ACGGGCGGTGTGTRCAA     | 89.2%    | 1406-1390                 | Mao et al. 2012. BMC Microbiol. 12:66.       |

Coverage (%) was calculated with the ROSE version 1.1.2.

**Supplementary Table S2** Sequences of respective LNA oligonucleotides and their properties

| Plant organelle | LNA oligonucleotide | 5'-Sequence-3'        | Size     | <i>T<sub>m</sub></i> value |
|-----------------|---------------------|-----------------------|----------|----------------------------|
| Mitochondria    | LNA-Mit63a          | gtcgaAcgTtgtTTtCgG-p  | 18 bases | 70 °C                      |
|                 | LNA-Mit63b          | gtcgaAcgTtGttCccTg-p  | 18 bases | 70 °C                      |
|                 | LNA-Mit1492a        | cttcAccecaGtcgAAgA-p  | 18 bases | 70 °C                      |
| Plastid         | LNA-Pla63a          | gtcgAacggGaagTggT-p   | 17 bases | 70 °C                      |
|                 | LNA-Pla63b          | tcgGacgggaaGTggT-p    | 16 bases | 70 °C                      |
|                 | LNA-Pla63c          | tcgGacgggaaACAag-p    | 16 bases | 71 °C                      |
|                 | LNA-Pla1492a        | cttcacTccaGtcgcAagC-p | 19 bases | 70 °C                      |
|                 | LNA-Pla1492b        | cttcacTccaGtcaCTagC-p | 19 bases | 71 °C                      |

Small letter and capital letter in the sequence indicated the DNA base and LNA base, respectively. The 3' end of all LNA oligonucleotides were phosphorylated to avoid the extension during PCR. It was indicated as "p" in the sequences.
